# Supplementary material for: Broad humoral and cellular immunity elicited by one-dose mRNA vaccination 18 months after SARS-CoV-2 infection
Source: Springer Nature journal article supplement (doi:10.1186/s12916-022-02383-4), 2022-05-04
Supplement: MOESM3 [file 20371332]

**Table S1. Detailed clinical information of each group in the present study**

|                                                                                  | NonConvVx ( <i>n</i> = 10)                  | Conv6mVx1 ( <i>n</i> = 10) | Conv6mVx2 ( <i>n</i> = 5) | Conv18mVx1 ( <i>n</i> = 18) | Conv18mVx2 ( <i>n</i> = 10) |
|----------------------------------------------------------------------------------|---------------------------------------------|----------------------------|---------------------------|-----------------------------|-----------------------------|
| Age, years, median (range)                                                       | 33 (25–47)                                  | 45 (27–63)                 | 43 (27–63)                | 27 (20–47)                  | 30 (22–51)                  |
| Male sex, <i>n</i> (%)                                                           | 5 (50)                                      | 4 (40)                     | 1 (20)                    | 5 (28)                      | 4 (40)                      |
| Vaccine type                                                                     |                                             |                            |                           |                             |                             |
| BNT162b2, <i>n</i> (%)                                                           | 10 (100)                                    | 10 (100)                   | 5 (100)                   | 6 (33)                      | 6 (60)                      |
| mRNA-1273, <i>n</i> (%)                                                          | 0 (0)                                       | 0 (0)                      | 0 (0)                     | 12 (67)                     | 4 (40)                      |
| Days from the diagnosis of COVID-19 to 1 <sup>st</sup> vaccination, median (IQR) | -                                           | 80 (45–146)                | 116 (51–176)              | 561 (558–570)               | 533 (529–539)               |
| Days from vaccination to the sample collection, median (IQR)                     | NonConvVx1: 8 (7–10)<br>NonConvVx2: 9 (8–9) | 32 (13–43)                 | 27 (21–28)                | 26 (17–28)                  | 12 (7–19)                   |

NonConvVx, the uninfected and vaccinated group; Conv6mVx1, vaccinated once within 6 months after COVID-19; Conv6mVx2, vaccinated twice within 6 months after COVID-19; Conv18mVx1, vaccinated once around 18 months after COVID-19; Conv18mVx2, vaccinated twice after 18 months around COVID-19; IQR, interquartile range
