# Supplementary material for: Broad humoral and cellular immunity elicited by one-dose mRNA vaccination 18 months after SARS-CoV-2 infection
Source: Springer Nature journal article supplement (doi:10.1186/s12916-022-02383-4), 2022-05-04

# Figure S4

**a**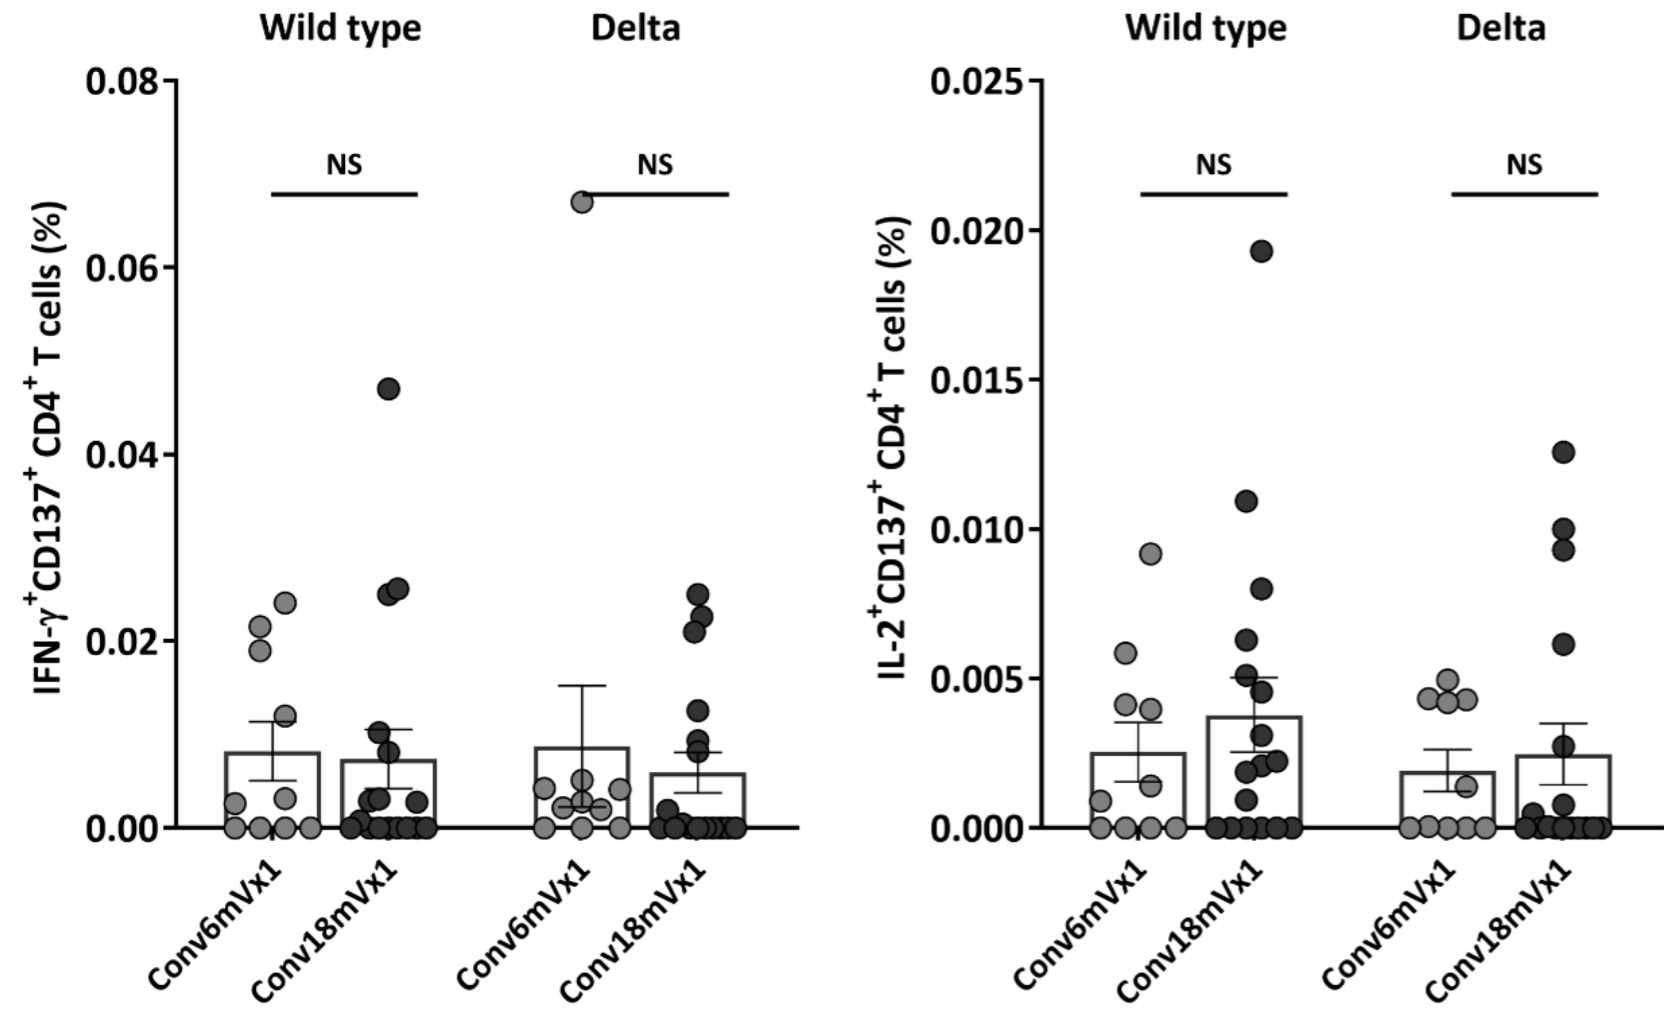**b**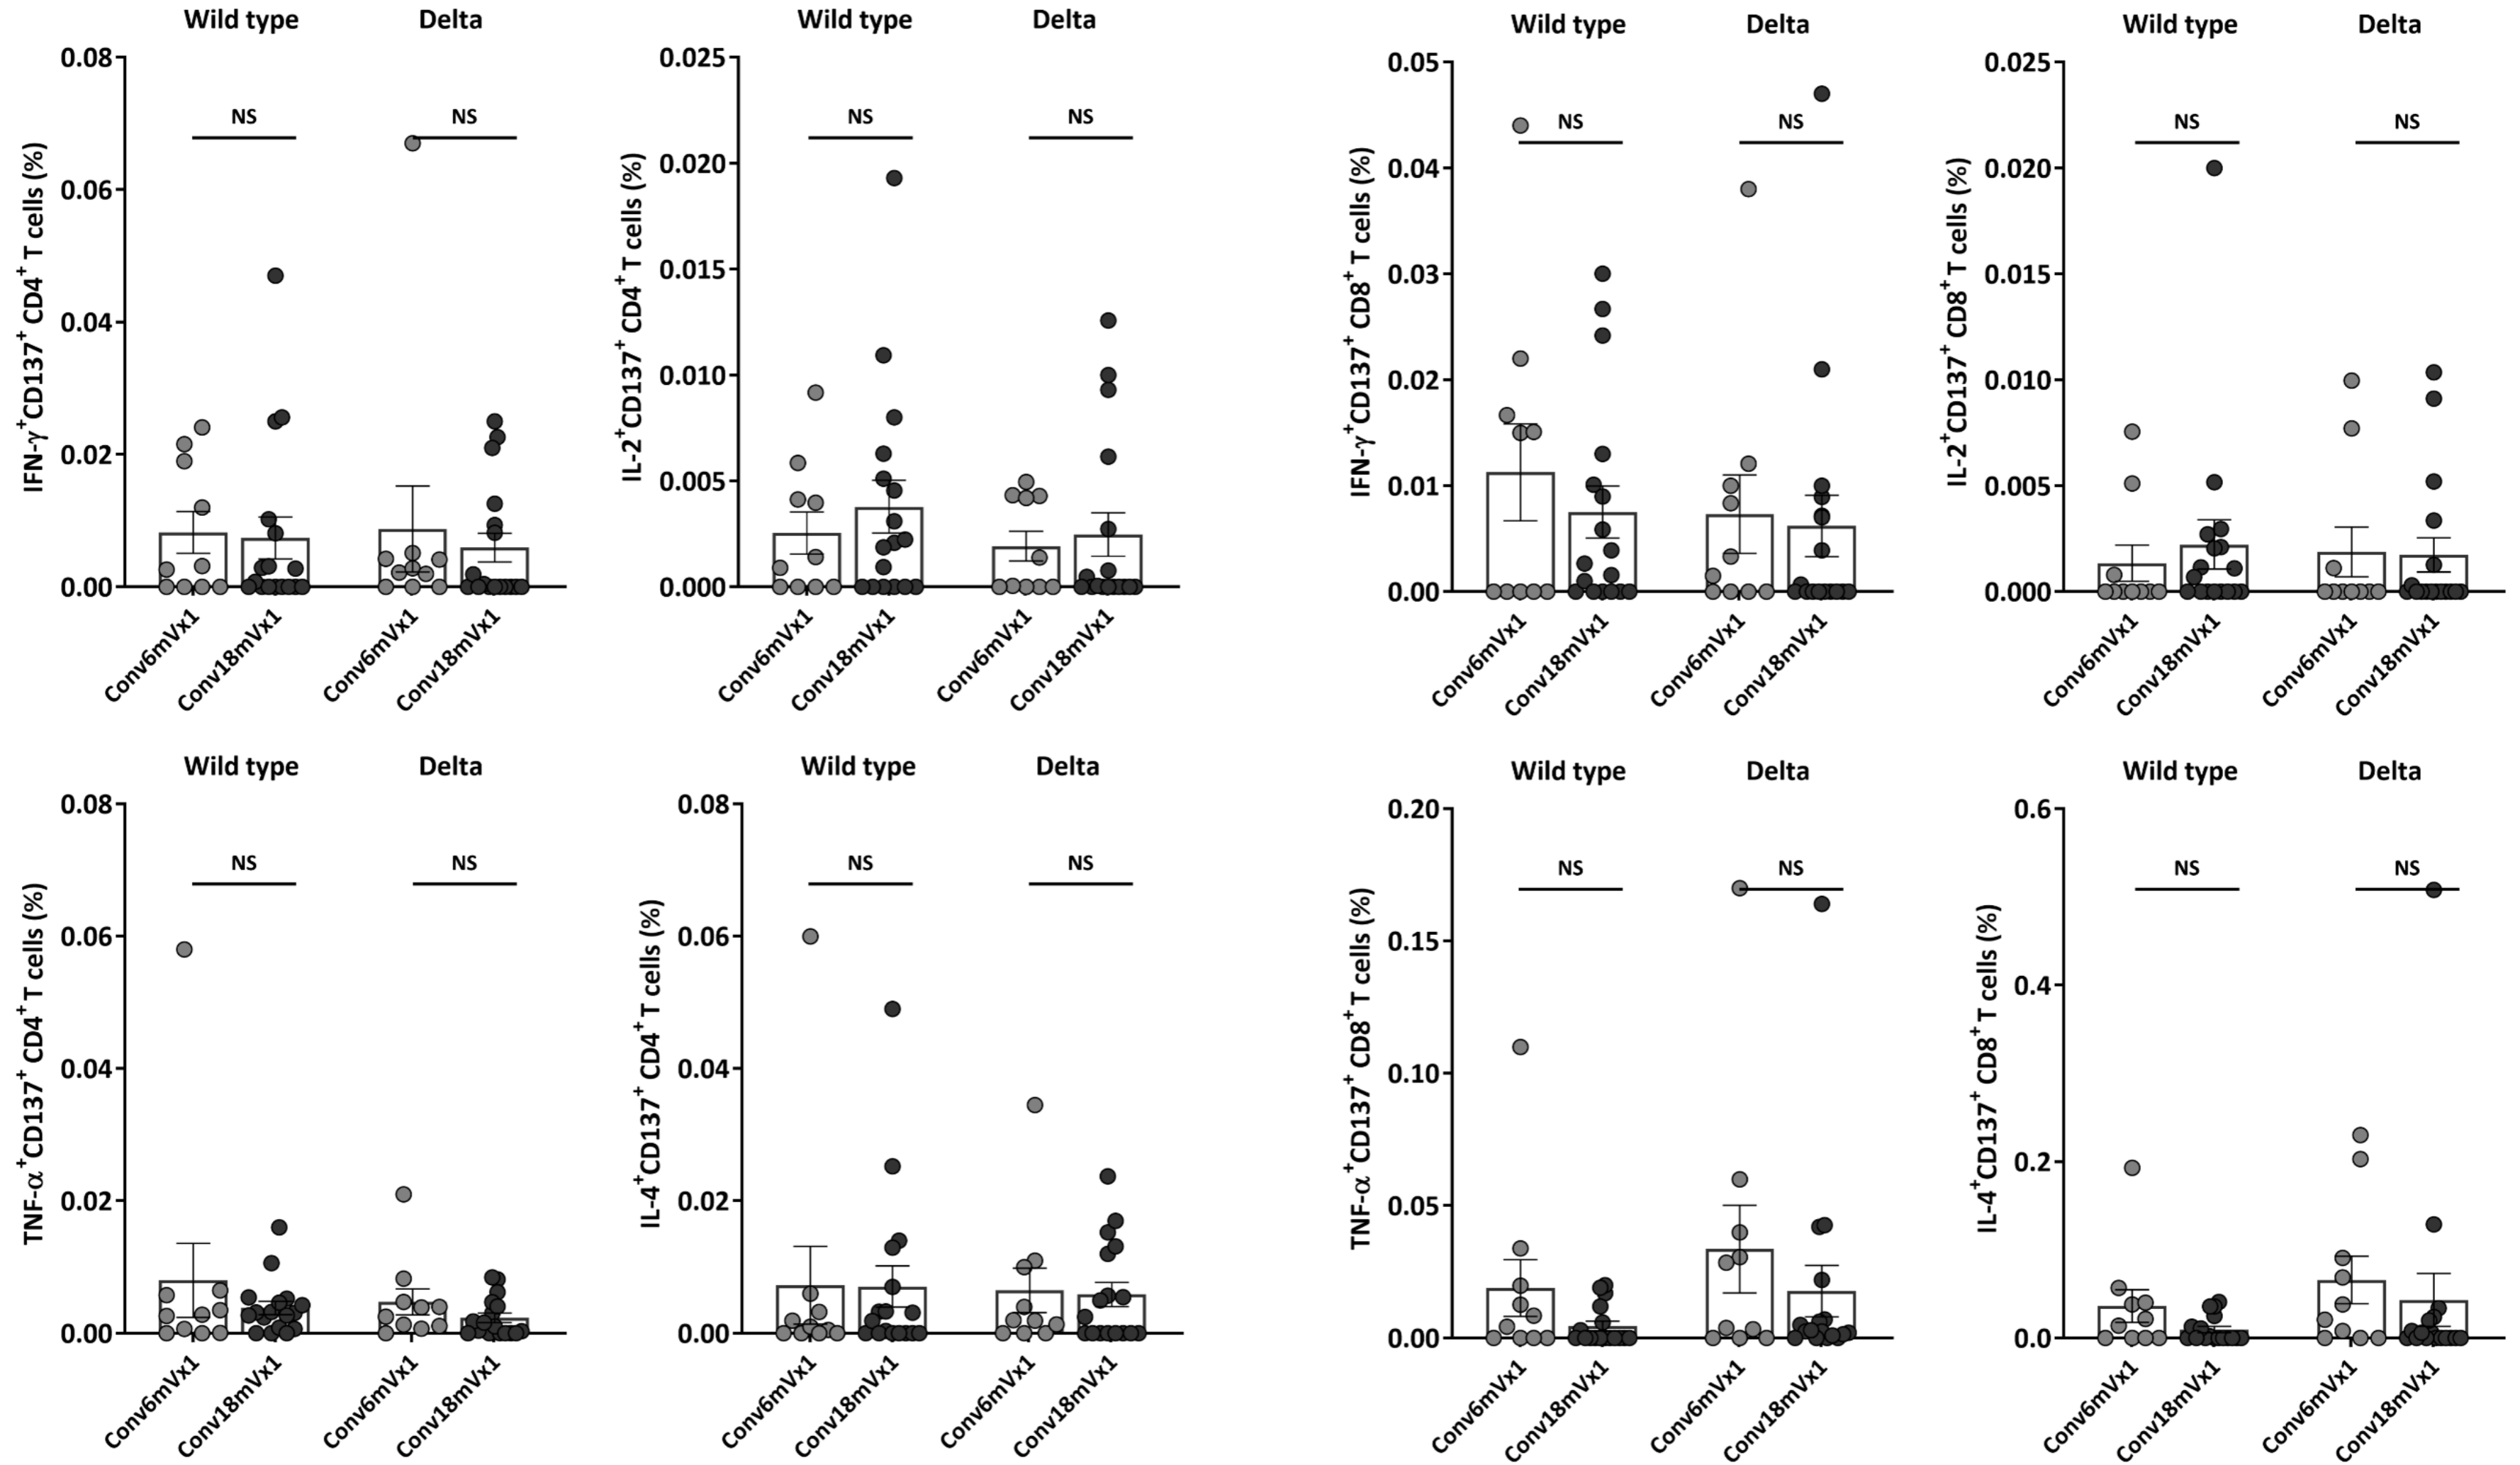

Supplement: MOESM5 [file 20371332]
